# Supplementary material
Source: HighWire-hosted journal article supplement (https://jnm.snmjournals.org/highwire/filestream/103724/field_highwire_adjunct_files/0/262096_Supplemental_Data.pdf)
Supplement: 262096_Supplemental_Data.pdf [file 262096_Supplemental_Data.pdf]

**Supplemental Table 1. Histology detail**

| <b>Histology</b>                                            | <b>Overall<br/>(n=47)</b> |
|-------------------------------------------------------------|---------------------------|
| Angiosarcoma                                                | 1 (2.0%)                  |
| Chordoma                                                    | 6 (12.0%)                 |
| Dedifferentiated chondrosarcoma                             | 1 (2.0%)                  |
| Endometrial stromal sarcoma                                 | 2 (4.0%)                  |
| Ewing Sarcoma                                               | 2 (4.0%)                  |
| Gastrointestinal stromal tumor                              | 2 (4.0%)                  |
| Leiomyosarcoma                                              | 4 (8.0%)                  |
| Low-grade myofibroblastic sarcoma                           | 1 (2.0%)                  |
| Malignant solitary fibrous tumor                            | 2 (4.0%)                  |
| Myxoid liposarcoma                                          | 3 (6.0%)                  |
| Malignant peripheral nerve sheath tumor                     | 1 (2.0%)                  |
| Mixed Müllerian tumor                                       | 1 (2.0%)                  |
| Myxofibrosarcoma                                            | 2 (4.0%)                  |
| Undifferentiated soft tissue sarcoma (NOS, round cell, UPS) | 6 (12.0%)                 |
| Undifferentiated bone sarcoma                               | 2 (4.0%)                  |
| Osteosarcoma                                                | 8 (16.0%)                 |
| Rhabdomyosarcoma of the bone                                | 1 (2.0%)                  |
| Synovialsarcoma                                             | 2 (4.0%)                  |

**Supplemental Table 2. FAPI uptake vs IHC on a per patient basis.** IHC scoring: 0 = no expression (<1%), 1+ = 1-10 %, 2+ = 11-49%, 3+ = ≥50% FAP-positive cells.

|                                | <b>IHC 0<br/>(n=8)</b> | <b>IHC 1<br/>(n=4)</b> | <b>IHC 2<br/>(n=3)</b> | <b>IHC 3<br/>(n=13)</b> | <b>Overall<br/>(n=47)</b> |
|--------------------------------|------------------------|------------------------|------------------------|-------------------------|---------------------------|
| <b>SUV<sub>max</sub> tumor</b> |                        |                        |                        |                         |                           |
| Mean (SD)                      | 12.0 (10.2)            | 13.5 (12.0)            | 12.8 (2.87)            | 23.1 (15.4)             | 15.2 (11.7)               |
| Median [Min, Max]              | 9.40 [3.90, 32.6]      | 9.05 [4.70, 31.2]      | 14.2 [9.50, 14.7]      | 22.8 [3.20, 61.9]       | 10.8 [3.20, 61.9]         |

**Supplemental Table 3. FAPI and FDG uptake for high versus low grade tumors.** In 7 patients tumor grading was not applicable.

|                   | high grade<br>(n=35) | low grade<br>(n=5) | not applicable<br>(n=7) | Overall<br>(n=47) |
|-------------------|----------------------|--------------------|-------------------------|-------------------|
| <b>FAPI</b>       |                      |                    |                         |                   |
| Mean (SD)         | 14.2 (12.0)          | 21.1 (12.5)        | 15.8 (9.52)             | 15.2 (11.7)       |
| Median [Min, Max] | 9.50 [3.60, 61.9]    | 18.0 [4.70, 34.5]  | 12.4 [3.20, 27.8]       | 10.8 [3.20, 61.9] |
| <b>FDG</b>        |                      |                    |                         |                   |
| Mean (SD)         | 13.6 (12.8)          | 9.10 (6.77)        | 7.55 (5.67)             | 12.2 (11.6)       |
| Median [Min, Max] | 11.8 [1.80, 64.6]    | 7.60 [3.80, 20.5]  | 6.70 [1.20, 17.0]       | 9.60 [1.20, 64.6] |

**Supplemental Table 4. Tracer-to-Background**

|                                | <b>FAPI<br/>(n=47)</b> | <b>FDG<br/>(n=43)</b> |
|--------------------------------|------------------------|-----------------------|
| <b>SUV<sub>max</sub> tumor</b> |                        |                       |
| Mean (SD)                      | 15.2 (11.7)            | 12.2 (11.6)           |
| Median [Min, Max]              | 10.8 [3.20, 61.9]      | 9.60 [1.20, 64.6]     |
| <b>TBR liver</b>               |                        |                       |
| Mean (SD)                      | 18.0 (14.8)            | 7.20 (8.22)           |
| Median [Min, Max]              | 14.1 [2.83, 78.0]      | 4.65 [0.800, 43.1]    |
| <b>TBR blood pool</b>          |                        |                       |
| Mean (SD)                      | 10.5 (8.39)            | 8.28 (8.10)           |
| Median [Min, Max]              | 7.47 [1.89, 34.4]      | 5.68 [0.947, 38.0]    |
| <b>TBR muscle</b>              |                        |                       |
| Mean (SD)                      | 11.8 (9.76)            | 24.3 (29.3)           |
| Median [Min, Max]              | 7.50 [2.46, 41.3]      | 16.0 [2.0 to162.0]    |

TBR liver (SUV<sub>max</sub> tumor/ SUV<sub>mean</sub> liver); TBR blood pool (SUV<sub>max</sub> tumor/ SUV<sub>mean</sub> blood pool); TBR muscle (SUV<sub>max</sub> tumor/ SUV<sub>mean</sub> muscle)

**Supplemental Table 5.** SE, SD, PPV and NPV on a per patient basis for histopathologically confirmed lesions.

|                     | Histopathol.<br>confirmed | Histopathol.<br>ruled out | Total     |     |       |
|---------------------|---------------------------|---------------------------|-----------|-----|-------|
| <b>PET positive</b> | <b>27</b>                 | <b>0</b>                  | <b>27</b> | PPV | 100 % |
| <b>PET negative</b> | <b>1</b>                  | <b>1</b>                  | <b>2</b>  | NPV | 50 %  |
| <b>Total</b>        | <b>28</b>                 | <b>1</b>                  | <b>29</b> |     |       |
|                     | Sensitivity<br>96 %       | Specificity<br>100 %      |           |     |       |

**Supplemental Table 6.** Lesion number on a per-patient and per-region basis.

|                          | PET-positive lesions, No. |            |
|--------------------------|---------------------------|------------|
|                          | FAPI (n=43)               | FDG (n=43) |
| <b>Per-patient basis</b> | 310                       | 345        |
| <b>Per-region basis</b>  |                           |            |
| Primary                  | 46                        | 48         |
| Local nodal              | 10                        | 13         |
| Distant nodal            | 19                        | 35         |
| Lung                     | 94                        | 110        |
| Bone                     | 56                        | 40         |
| Other                    | 85                        | 99         |

Abbreviations: PET, positron emission tomography; FAPI, fibroblast-activation protein inhibitor; FDG, fluorodeoxyglucose

**Supplemental Table 7. List of patients with major change in treatment.**

| Patient no. | Intended treatment                   | Management towards                | Change in stage by FAPI-PET             | Disease extent |
|-------------|--------------------------------------|-----------------------------------|-----------------------------------------|----------------|
| 1           | Radio-/Chemotherapy                  | Best supportive care              | Upstaged<br>local to metastatic         | increase       |
| 2           | Local radiochemotherapy              | Systemic therapy                  | No change<br>Metastatic to metastatic   | decrease       |
| 3           | Local radiochemotherapy              | Systemic therapy                  | Upstaged<br>No disease to local disease | increase       |
| 4           | Neoadjuvant chemotherapy and surgery | Systemic therapy                  | Downstaged<br>Local to no disease       | decrease       |
| 5           | Radio-/Chemotherapy                  | Active surveillance               | No change<br>Local to local             | equal          |
| 6           | Chemotherapy                         | Local therapy (radiation therapy) | No change<br>Metastatic to metastatic   | increase       |
| 7           | Chemotherapy and surgery             | Best supportive care              | No change<br>Metastatic to metastatic   | equal          |

# Supplemental Figures

**Supplemental Figure 1.** Timeline of investigations. Study timelines are shown in blue. Procedures as per clinical routine are shown in green.

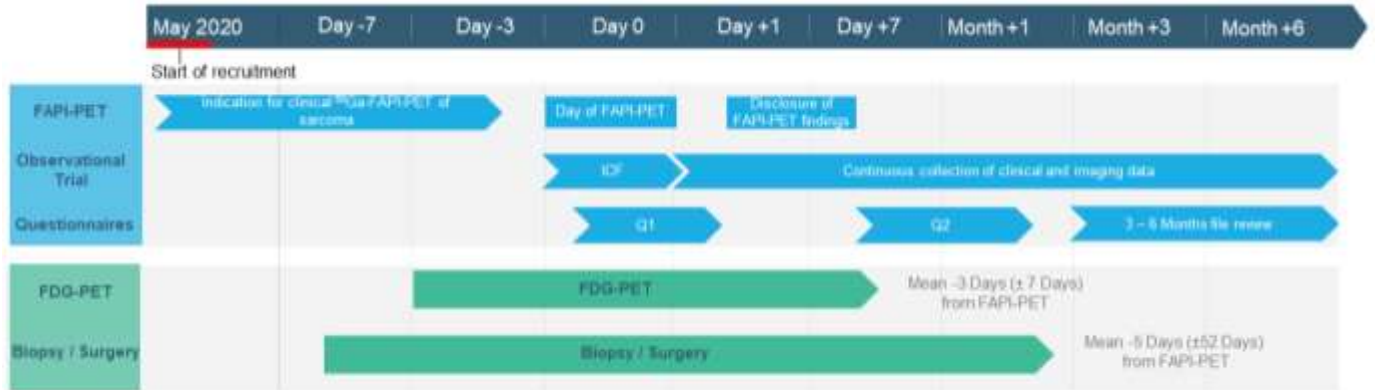



**Supplemental Figure 2. Mean and maximum organ uptake and tumor to background ratios (TBRs).** Left diagram shows  $SUV_{max}$  for FAPI and FDG in tumor lesions in the predefined regions. Further  $SUV_{mean}$  for background tracer uptake shows lower background  $SUV_{mean}$  for FAPI in liver and blood pool, but higher  $SUV_{mean}$  in muscle (middle diagram). The right diagram shows higher TBRs for FAPI vs FDG normalized by liver uptake but lower TBR by normalization to muscle uptake.

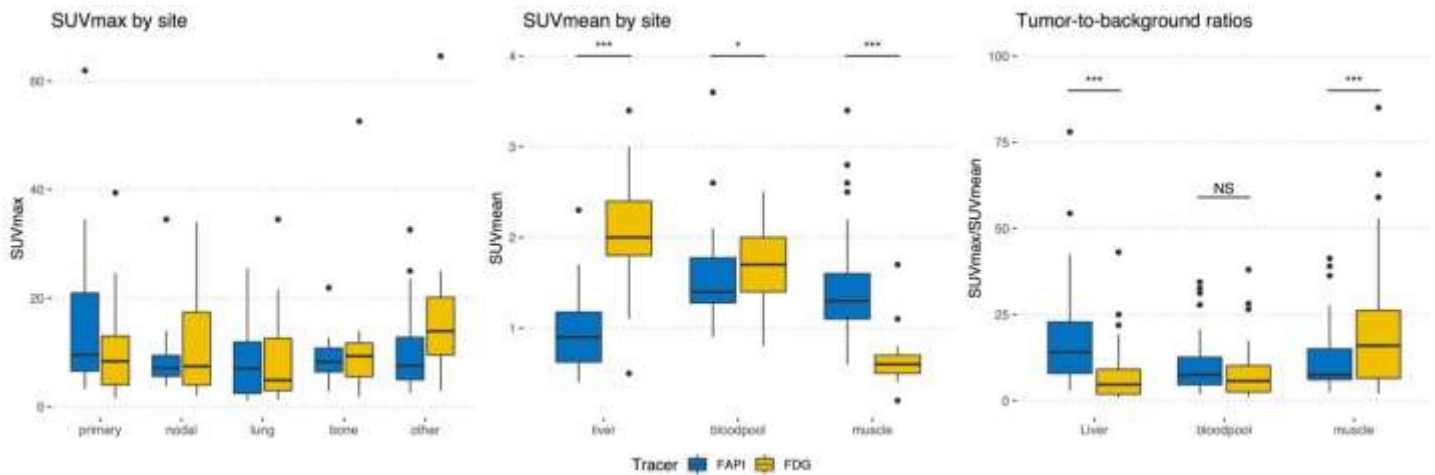

**Supplemental Spreadsheet 1.** Reading Raw Data. Excel-spreadsheet of reading raw data for Reader 1 FAPI-PET interpretation.

**Supplemental Spreadsheet 2.** Reading Raw Data. Excel-spreadsheet of reading raw data for Reader 1 FDG-PET interpretation.

**Supplemental Spreadsheet 3.** Reading Raw Data. Excel-spreadsheet of reading raw data for Reader 2 FAPI-PET interpretation.

**Supplemental Spreadsheet 4.** Reading Raw Data. Excel-spreadsheet of reading raw data for Reader 2 FDG-PET interpretation.
